# Supplementary material for: Influenza H1 Mosaic Hemagglutinin Vaccine Induces Broad Immunity and Protection in Mice
Source: PubMed Central journal article supplement (PMC6963302; doi:10.3390/vaccines7040195), 2019-11-23
Supplement: vaccines-07-00195-s001.pdf [file vaccines-07-00195-s001.pdf]

### Supplemental Figure S1

Western blot analysis of recombinant HA expressed in Adenovirus type 5. Relative protein quantity, as determined by densitometry, is shown for each band.

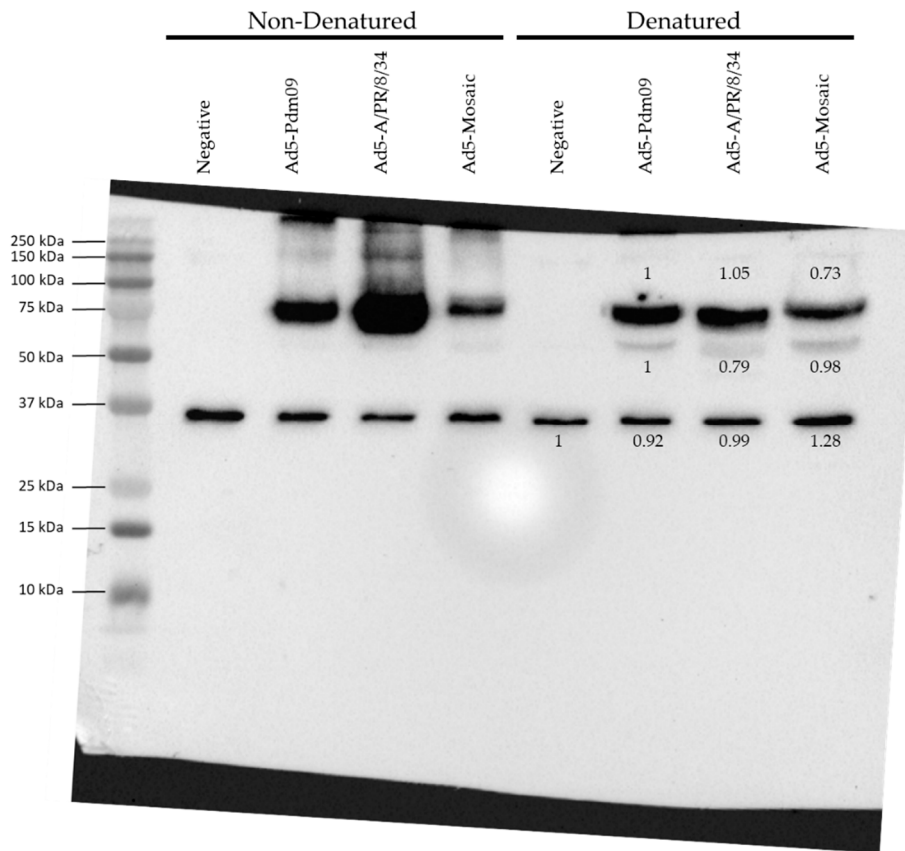

**Supplemental Table 1.** Overview of Immunostimulatory Peptides Mapped by ELISpot Assay. The Immune Epitope Database and Analysis Resource (iedb.org) from the NIAID was used to search all immunostimulatory peptides identified by IFN- $\gamma$  ELISpot Assay with the following parameters; Epitope: linear epitope, substrings; Antigen Organism: any; Host: any; Assay: positive assays only; MHC Restriction: any MHC restriction; Disease: any disease. The peptide number, sequence, and vaccine groups for each positive peptide are shown. Epitopes within the peptide sequence that have induced immune responses by binding MHC, binding B cells, inducing cytokines, inducing cytotoxicity, or other relevant responses are specified.

|                    | Peptide | Peptide Sequence       | Positive Vaccines           | Positive MHC                            | B cell Binding | T cell cytokines     | T cell cytotoxicity | Other |
|--------------------|---------|------------------------|-----------------------------|-----------------------------------------|----------------|----------------------|---------------------|-------|
| A/Brisbane/59/2007 | 31      | YANNKEKEV<br>LVLWGVHH  | Mosaic                      | Mamu-A1                                 | Yes            | -                    | -                   | -     |
|                    | 36      | ENAYVSVVSS<br>HYSRKFT  | Mosaic                      | HLA-A; HLA-B                            | Yes            | -                    | -                   | -     |
|                    | 37      | VVSSHYSRKF<br>TPEIAKR  | Mosaic                      | -                                       | -              | -                    | -                   | -     |
|                    | 77      | NVKNLYEKV<br>KSQLKNNNA | Mosaic, Pdm09,<br>A/PR/8/34 | H2-Kd, H2-Db,<br>H2-Kb, H2-Ld,<br>HLA-A | Yes            | IFN- $\gamma$ ; IL-4 | Yes                 | -     |

|              |     |                       |                             |                                              |     |                                                     |     |                                                                        |
|--------------|-----|-----------------------|-----------------------------|----------------------------------------------|-----|-----------------------------------------------------|-----|------------------------------------------------------------------------|
|              | 89  | ILAIYSTVASS<br>LVLLVS | Mosaic, Pdm09,<br>A/PR/8/34 | H2-Kd; H2-Kb;<br>HLA-B37; HLA-<br>A; Mamu-A1 | yes | IFN- $\gamma$ ; IL-4; IL-<br>2; IL-13; TNF $\alpha$ | yes | Decreased disease;<br>degranulation; T cell<br>binding & proliferation |
| A/NC/20/1999 | 31  | SYVNNKEKE<br>VLVLWGVH | Mosaic                      | Mamu-A1                                      | -   | -                                                   | -   | -                                                                      |
|              | 36  | HTENAYVSV<br>VSSHYSRR | Mosaic                      | HLA-A; HLA-B                                 | yes | -                                                   | -   | -                                                                      |
|              | 78  | VKNLYEKVK<br>SQLKNNAK | Mosaic, Pdm09,<br>A/PR/8/34 | H2-Kd; H2-Db;<br>H2-Kb                       | yes | IFN- $\gamma$ ; IL-4                                | yes | -                                                                      |
|              | 90  | YQILAIYSTV<br>ASSLVL  | Mosaic, Pdm09,<br>A/PR/8/34 | H2-Kd; H2-Kb;<br>HLA-B37; HLA-<br>A; Mamu-A1 | yes | IFN- $\gamma$ ; IL-4; IL-<br>2; IL-13; TNF $\alpha$ | yes | Decreased disease;<br>degranulation; T cell<br>binding & proliferation |
| A/CA/07/2009 | 38  | VTAACPHAG<br>AKSFYK   | Pdm09                       | HLA-A                                        | -   | -                                                   | -   | -                                                                      |
|              | 39  | CPHAGAKSF<br>YKNLIW   | Pdm09                       | HLA-A                                        | -   | -                                                   | -   | -                                                                      |
|              | 40  | GAKSFYKNLI<br>WLVKK   | Pdm09                       | HLA-A                                        | -   | -                                                   | -   | -                                                                      |
|              | 43  | VKKGNSYPK<br>LSKSYI   | Pdm09                       | -                                            | -   | -                                                   | -   | -                                                                      |
|              | 44  | NSYPKLSKSYI<br>NDKG   | Pdm09                       | -                                            | -   | -                                                   | -   | -                                                                      |
|              | 47  | DKGKEVLVL<br>WGIHHP   | Mosaic                      | -                                            | yes | -                                                   | -   | -                                                                      |
|              | 54  | DAYVFGSSR<br>YSKKF    | Pdm09                       | -                                            | -   | -                                                   | -   | T cell quantitative<br>binding                                         |
|              | 115 | SNVKNLYEK<br>VRSQK    | Mosaic, Pdm09,<br>A/PR/8/34 | H2-Db; H2-Kb;<br>SLA-3                       | -   | -                                                   | -   | -                                                                      |
|              | 116 | NLYEKVRSQK<br>KNNAK   | Pdm09,<br>A/PR/8/34         | SLA-3                                        | -   | -                                                   | -   | -                                                                      |
|              | 133 | QILAIYSTVAS<br>SLVL   | Mosaic, Pdm09,<br>A/PR/8/34 | H2-Kd; H2-Kb;<br>HLA-B37; HLA-<br>A; Mamu-A1 | yes | IFN- $\gamma$ ; IL-4; IL-<br>2; IL-13; TNF $\alpha$ | yes | Decreased disease;<br>degranulation; T cell<br>binding & proliferation |
|              | 135 | VASSLVLVVS<br>LGAIS   | Mosaic, Pdm09,<br>A/PR/8/34 | -                                            | -   | -                                                   | -   | -                                                                      |
